# Supplementary material for: Transitions Between Jail and Community-Based Treatment for Individuals With Co-occurring Disorders
Source: Atypon-hosted journal article supplement (doi:10.1176/ps.62.6.pss6206_0679), 2011-06-01
Supplement: Kubiak_ds.pdf [file Kubiak_ds.pdf]

Demographic characteristics and co-occurring disorder diagnoses for community mental health sample of individuals with co-occurring disorders that were confined in the county jail during the study period (n=677)

| Demographics                                                      |                       | Mean (SD)          |                  |               |                 |
|-------------------------------------------------------------------|-----------------------|--------------------|------------------|---------------|-----------------|
| Age (in Years)                                                    |                       | 37.0 ± 9.8         |                  |               |                 |
|                                                                   |                       | <b>N (%)</b>       |                  |               |                 |
| <b>Gender</b>                                                     |                       |                    |                  |               |                 |
| Male                                                              |                       | 452 (67)           |                  |               |                 |
| Female                                                            |                       | 225 (33)           |                  |               |                 |
| <b>Race</b>                                                       |                       |                    |                  |               |                 |
| White                                                             |                       | 228 (34)           |                  |               |                 |
| Black                                                             |                       | 253 (37)           |                  |               |                 |
| Other                                                             |                       | 9 (1)              |                  |               |                 |
| Missing                                                           |                       | 187 (28)           |                  |               |                 |
| <b>Co-occurring disorders for those that went to jail (N=677)</b> |                       |                    |                  |               |                 |
|                                                                   | Alcohol<br>Dependency | Drug<br>Dependency | Alcohol<br>Abuse | Drug<br>Abuse | <b>Totals</b>   |
|                                                                   | n(%)                  | n(%)               | n(%)             | n(%)          | n(%)            |
| Schizophrenia                                                     | 37(6)                 | 94(14)             | 19(3)            | 16(2)         | <b>166(25)</b>  |
| Bipolar<br>Disorder                                               | 36(5)                 | 102(15)            | 11(2)            | 4(1)          | <b>153(23)</b>  |
| Major<br>Depressive<br>Disorder                                   | 10(2)                 | 39(6)              | 2(<1)            | 2(<1)         | <b>53(8)</b>    |
| Depressive<br>Disorder NOS                                        | 131(19)               | 159(23)            | 6(1)             | 9(1)          | <b>305(44)</b>  |
| <b>Totals</b>                                                     | <b>214(32)</b>        | <b>394(58)</b>     | <b>38(6)</b>     | <b>31(4)</b>  | <b>677(100)</b> |

\*Percentages represent percent of the total sample of 677, and not percent of column or row sample only

Logistic regression of post-incarceration mental health treatment in the community versus no mental health treatment in the community on co-occurring disorder diagnosis groups

|                       | Odds Ratio | 95% Confidence Interval | p value |
|-----------------------|------------|-------------------------|---------|
| Co-occurring disorder |            |                         |         |
| <b>Schizophrenia</b>  |            |                         |         |
| Dependence            | ref        | ref                     | ref     |

|                         |      |             |      |
|-------------------------|------|-------------|------|
| Abuse                   | 1.30 | .70 - 2.42  | .41  |
| <b>Bipolar disorder</b> |      |             |      |
| Dependence              | .51  | .33 - .79   | <.01 |
| Abuse                   | 2.22 | .87 - 5.67  | .01  |
| <b>Major depressive</b> |      |             |      |
| Dependence              | .21  | .11 - .39   | <.01 |
| Abuse                   | 1.08 | .32 - 3.61  | .91  |
| <b>Depressive NOS</b>   |      |             |      |
| Dependence              | .35  | .24 - .52   | <.01 |
| Abuse                   | .53  | .22 - 1.27  | .16  |
| Control variables       |      |             |      |
| <b>Female</b>           | 1.37 | 1.02 - 1.83 | .04  |
| <b>Age</b>              | 1.01 | .99 - 1.02  | .23  |
